# Supplementary material
Source: PubMed Central journal article supplement (PMC4120877)

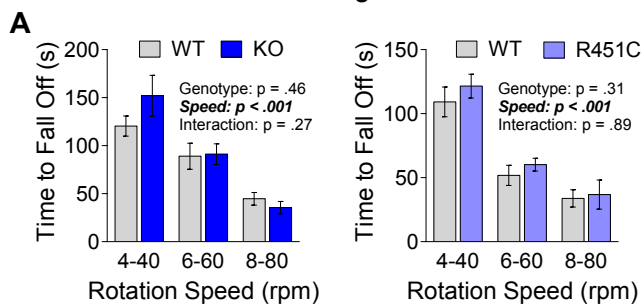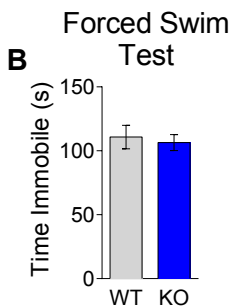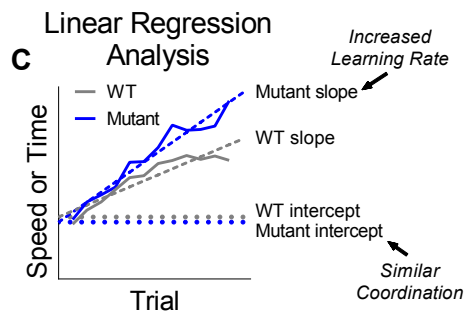

Rotarod: Hybrid Genetic Background

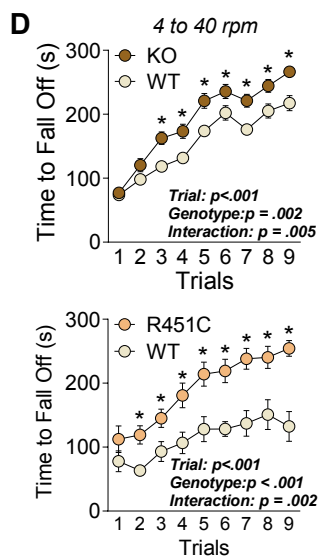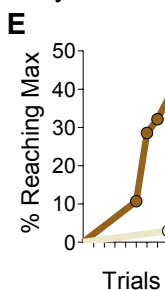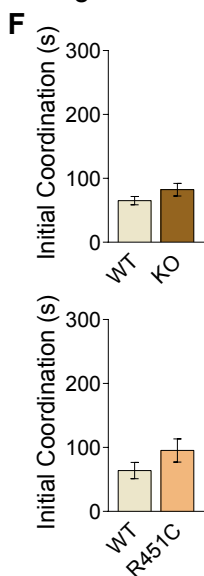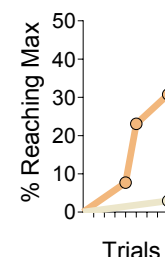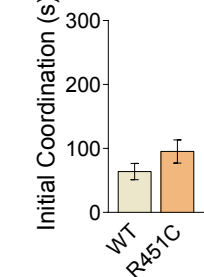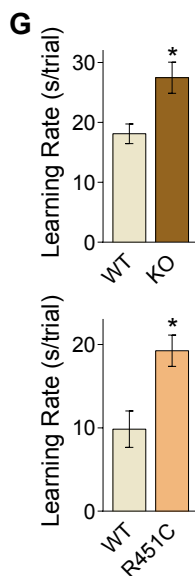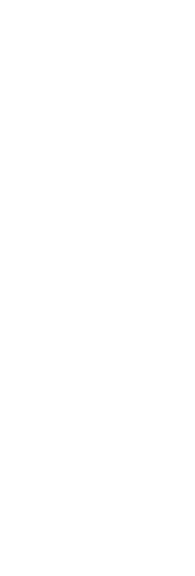

Rotarod: Video Analysis of Foot Steps

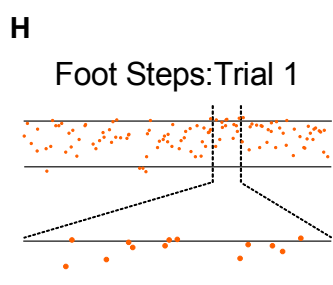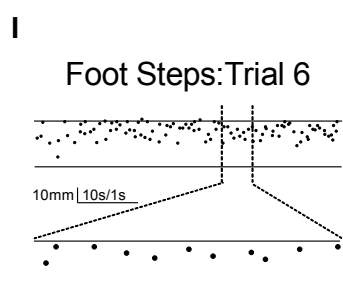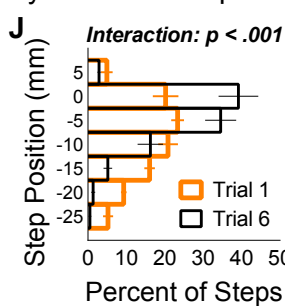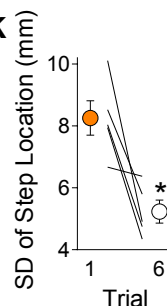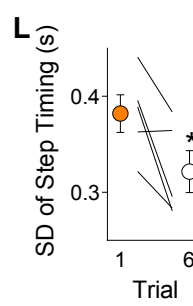

Open Field

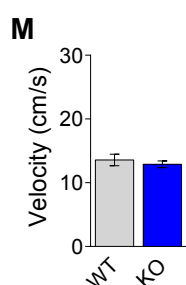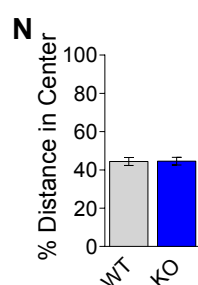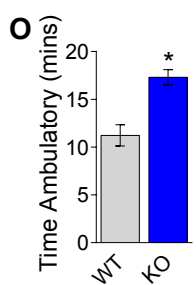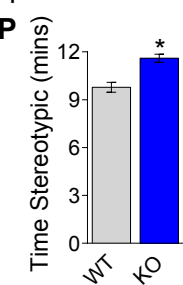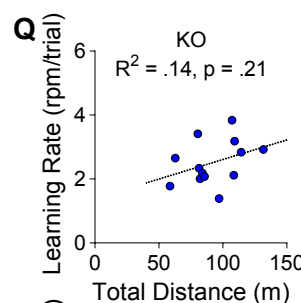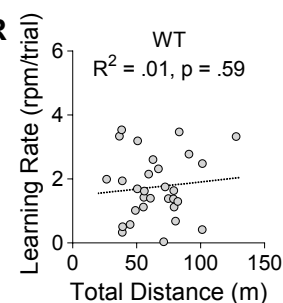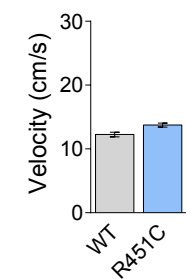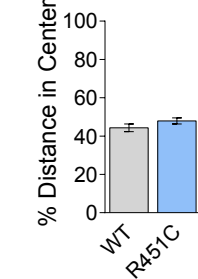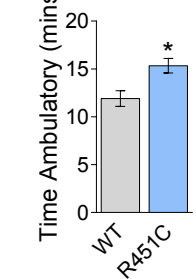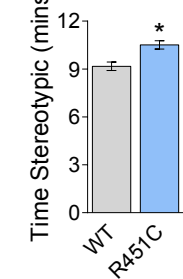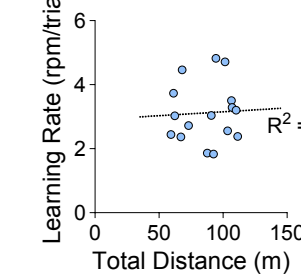

## Generation of NL3-cKO Mouse Line

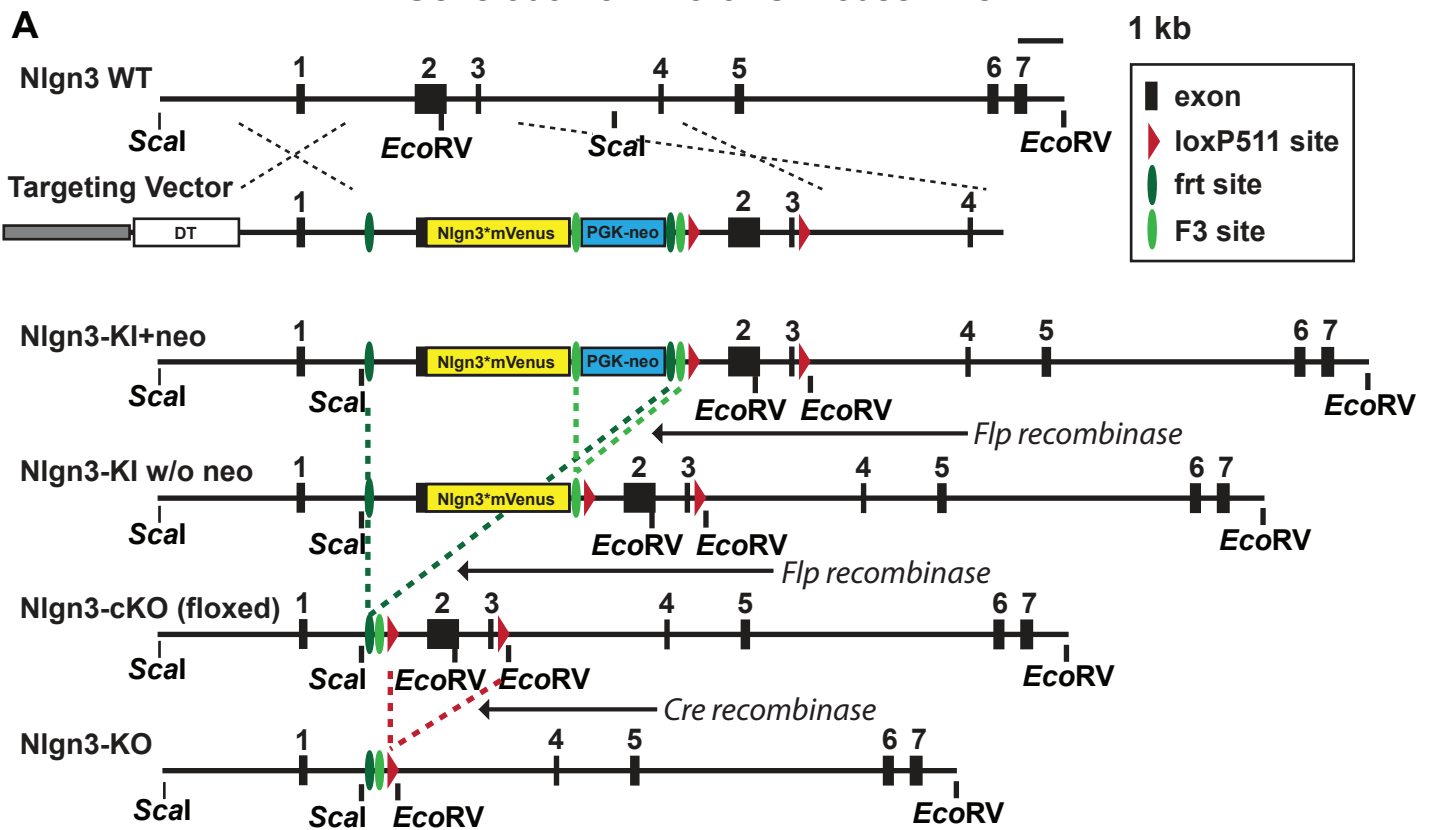

## Southern Blot

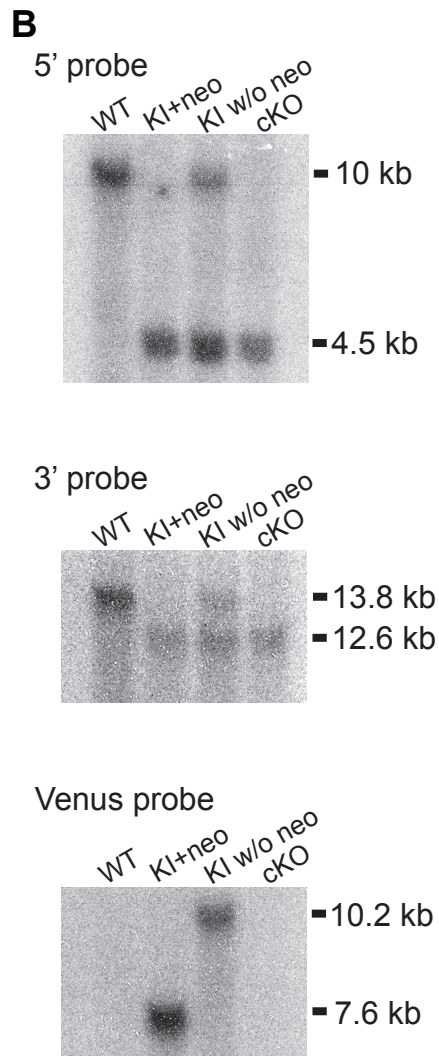

## NL3-cKO x PV-Cre

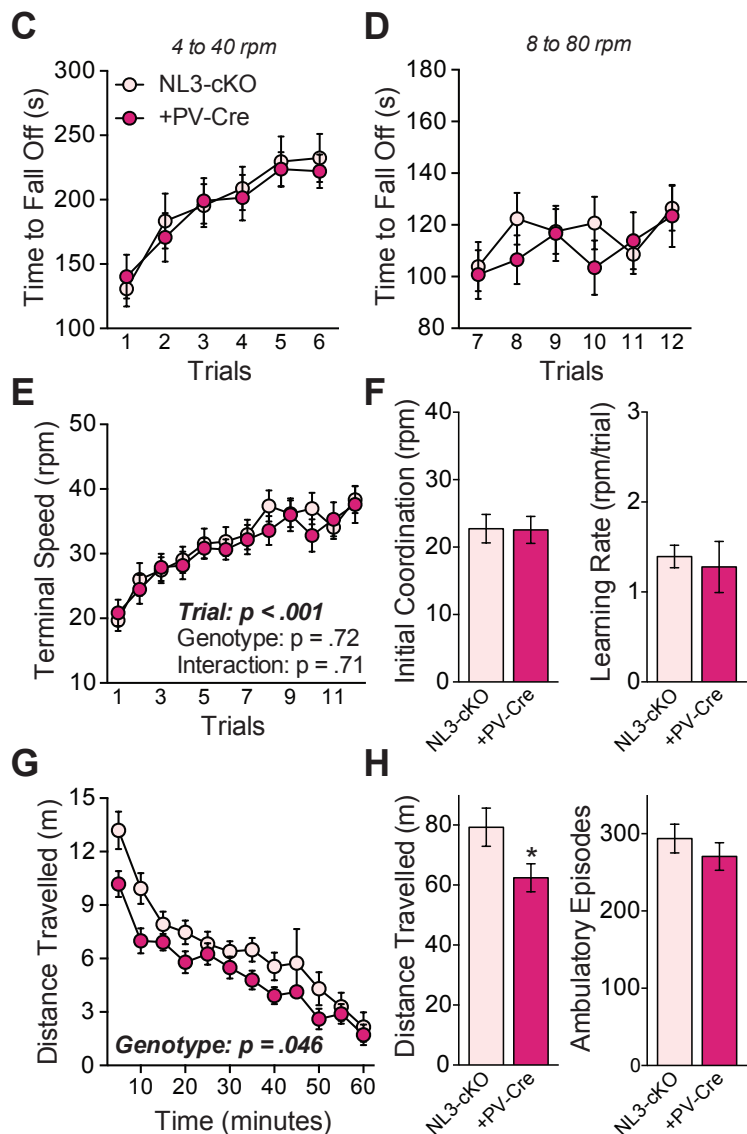

**A**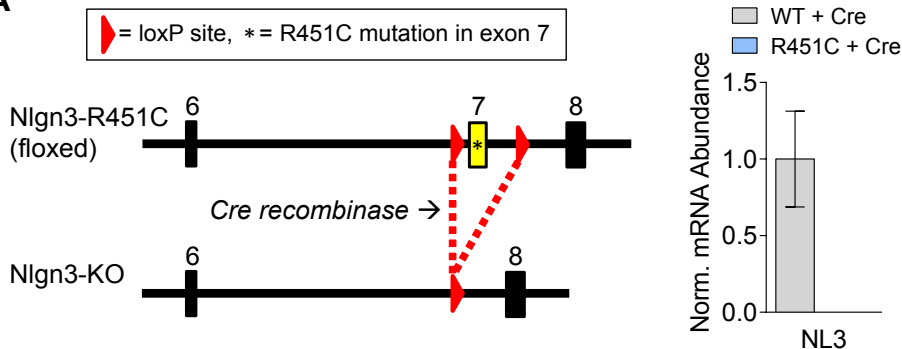

NL3-R451C x D1-Cre

**B**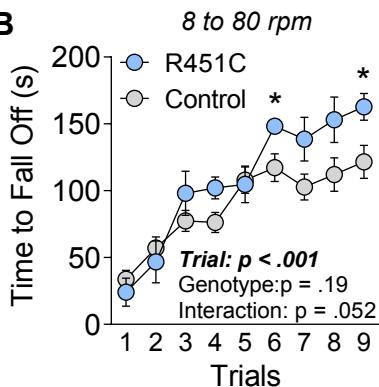**C**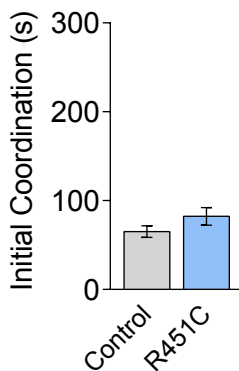**D**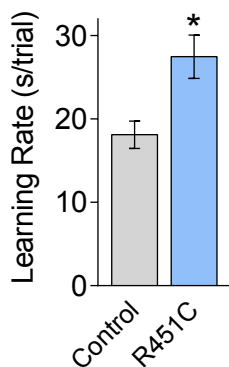

NL3-R451C + AAV-Cre → NAc

**E**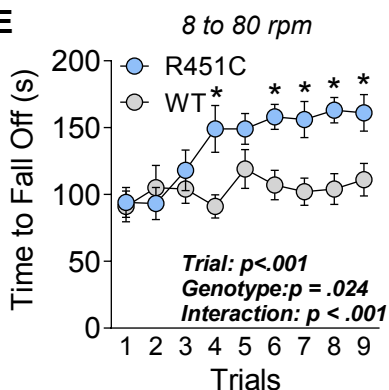**F**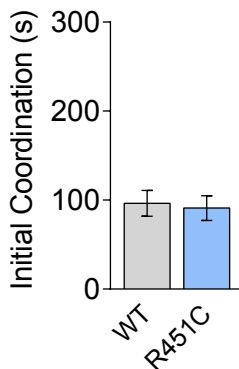**G**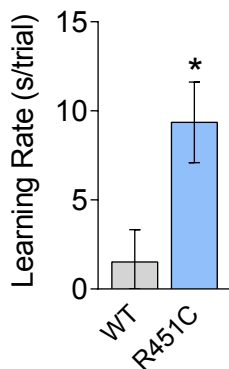

# A Supplemental Figure S4

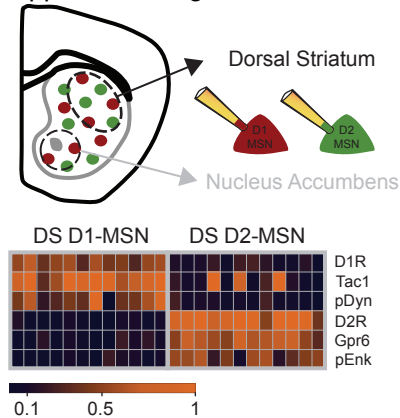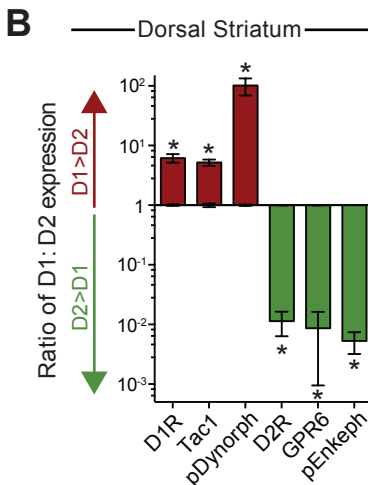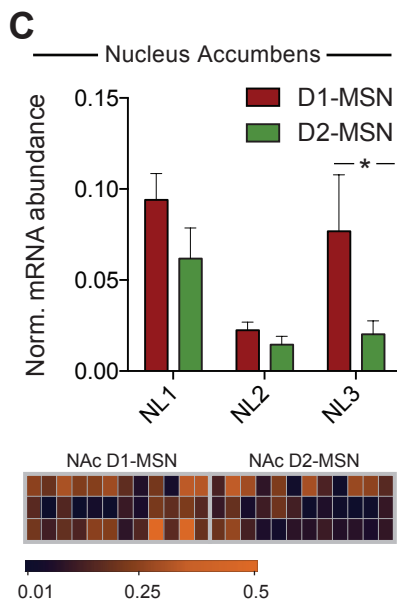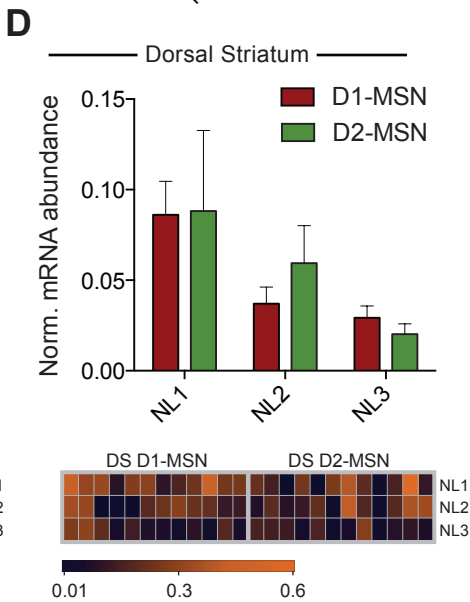

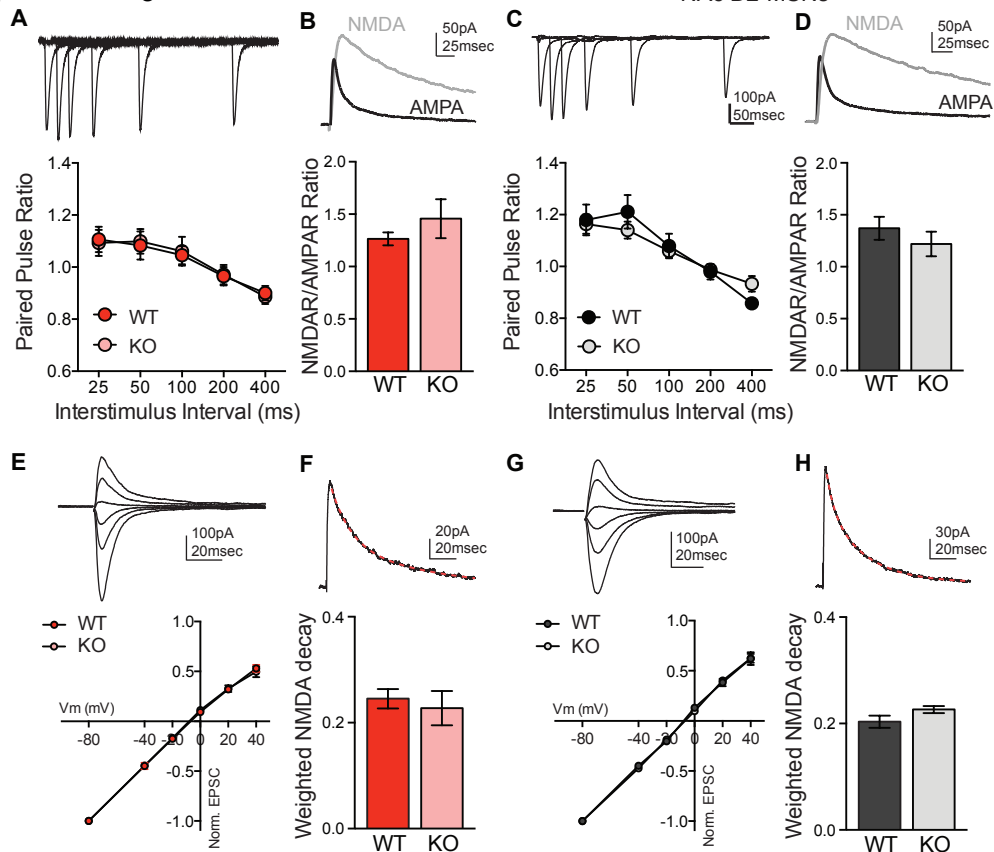

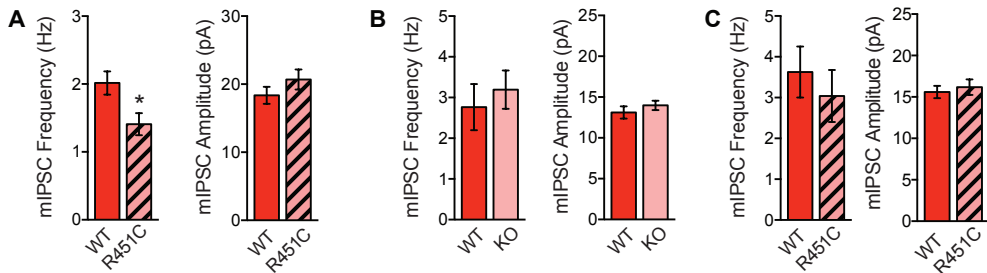

## NAc D1-MSNs

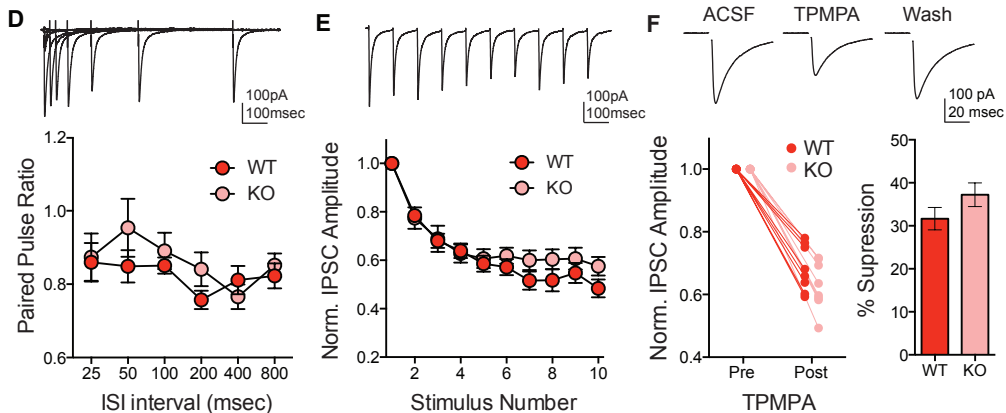

## Inhibitory Synapses

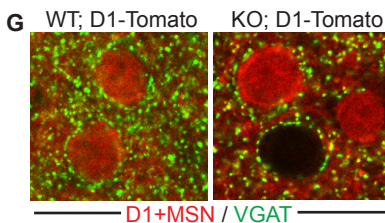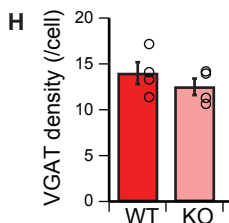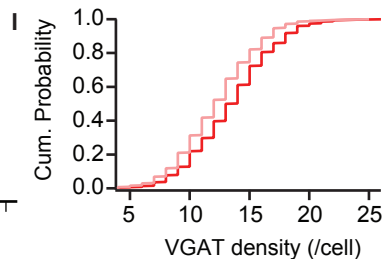

# Supplemental Figure S7

NL3-cKO x D1-Cre

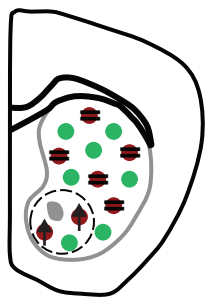

+ AAV-DIO-Kir2.1

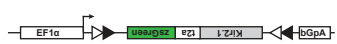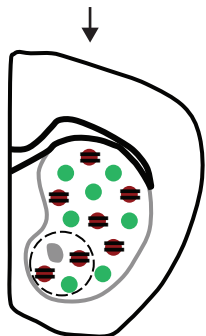

**B**

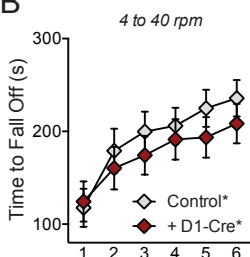

**C**

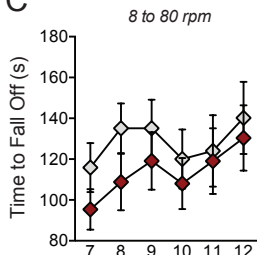

**D**

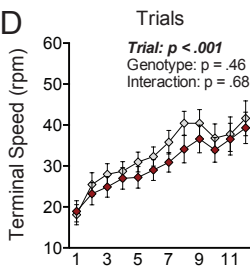

**E**

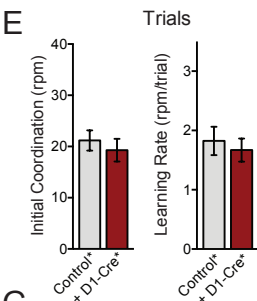

**F**

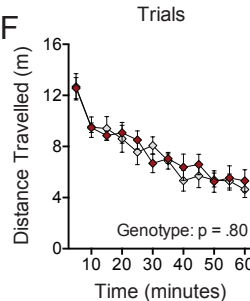

**G**

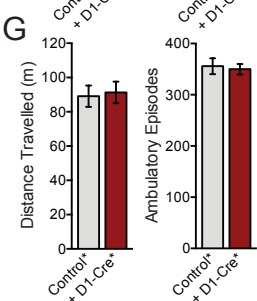

**H**

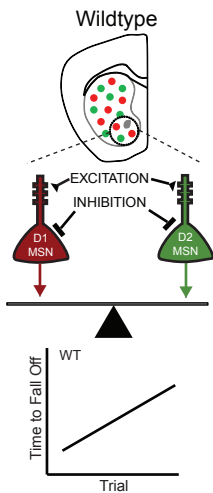

**I**

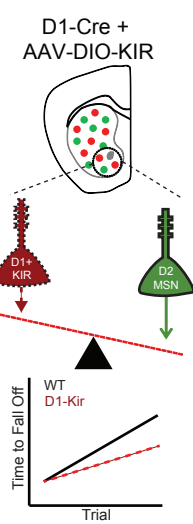

**J**

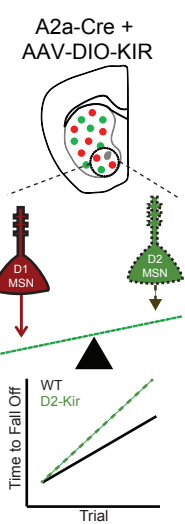

**K**

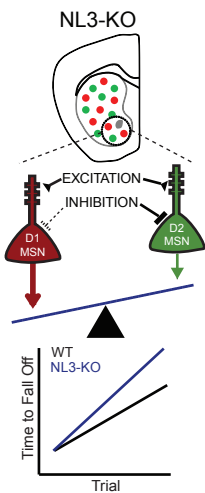

Supplement: NIHMS602894-supplement-02.pdf [file NIHMS602894-supplement-02.pdf]
